# Supplementary material
Source: publisher figshare collection journal article supplement (https://karger.figshare.com/ndownloader/files/26663306)
Supplement: Supplementary file 1 [file 26663306]

**Supplemental Figure 1. Clinical Pictures of Mice following 9-day Treatments.**

6-8 week old female C57BL/6J mice were topically treated with GC (0.05% clobetasol) or GC plus Heparinoid® cream, as described in Materials and Methods. Suppl Fig 1a. Normal mice; Suppl Fig 1b. Heparinoid® cream-treated mice; Suppl Fig 1c. GC-treated mice; Suppl Fig 1d. Mice treated with both Heparinoid® cream GC.

**Supplemental Figure 2. Histology of the Skin**

Skin samples were taken following6-day treatments as described in the Materials and Methods. Scale bar=100 m for all.
